# Supplementary material for: Electronic Structure and Magnetic Coupling of Pure and Mg-Doped KCuF3
Source: Hindawi journal article supplement (doi:10.1155/2018/9164270), 2018-08-15
Supplement: f1 [file 9164270.f1.zip]

# SUPPORTING INFORMATION FOR

## Electronic structure and magnetic coupling of pure and Mg-doped $\text{KCuF}_3$

Fausto Cargnoni,<sup>1</sup> Simone Cenedese,<sup>1</sup> Paolo Ghigna<sup>2</sup>, Mario Italo Trioni<sup>1</sup>, Marco Scavini,<sup>1,3</sup>

1. Consiglio Nazionale delle Ricerche - Istituto di Scienze e Tecnologie Molecolari, Via  
Golgi 19, 20133 Milano - Italy
2. Dipartimento di Chimica, Università di Pavia, and Unità INSTM di Pavia, Viale  
Taramelli 13, 27100 Pavia – Italy
3. Dipartimento di Chimica, Università degli Studi di Milano, Via Golgi 19, 20133 Milano  
- Italy

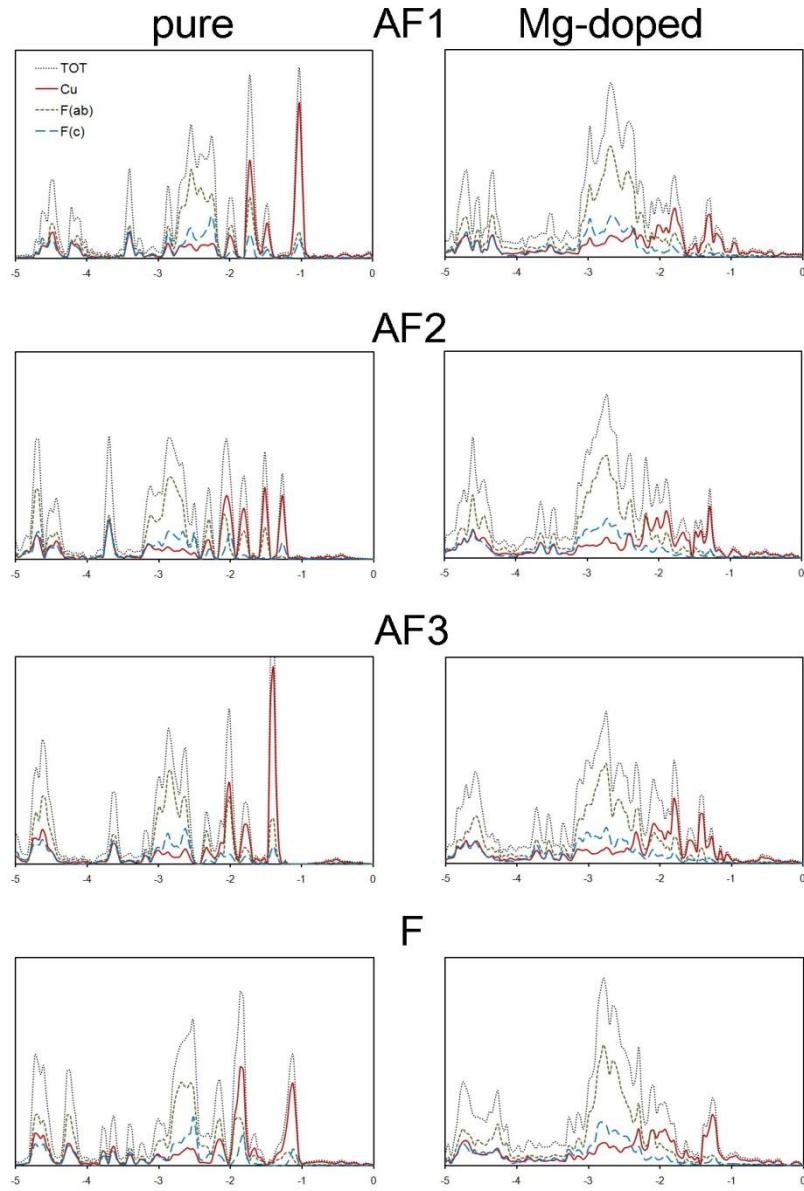

FIGURE 1SI. Total and projected DOS of pure (left) and Mg doped (right)  $\text{KCuF}_3$ . The Fermi level is set to zero. No relevant contribution from K and Mg is present in the energy range of the plots.

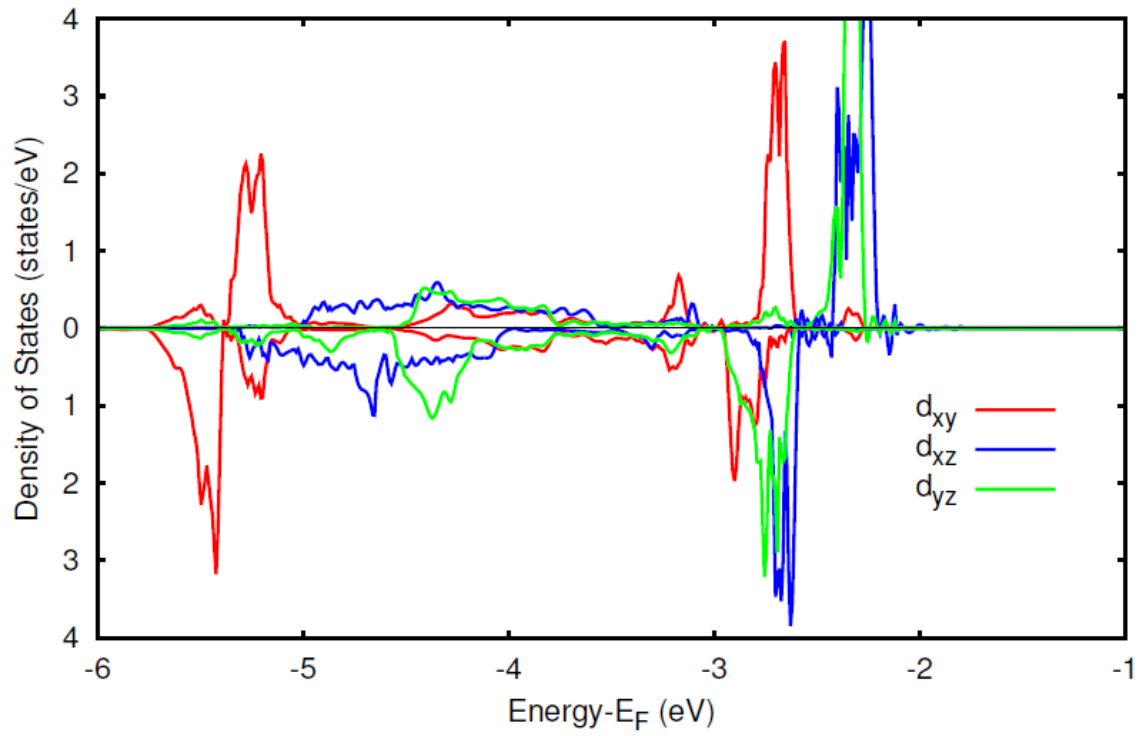

FIGURE 2SI. Projected density of states on copper atoms of pure  $\text{KCuF}_3$  determined at the B3LYP level of theory for the AF1 phase for the  $d_{xy}$  (red line),  $d_{xz}$  (blue line) and  $d_{yz}$  (green line) orbitals.

**Table 1SI.** Magnetic coupling parameters between Cu pairs in  $ab$  planes ( $J_{ab}$ ) and along the  $c$  axis ( $J_c$ ) determined with the BECKE and LYP exchange and correlation functionals, respectively, without any Hartree-Fock exchange contribution.

| Material        | Transition | $J_{ab}$ (K) | $J_c$ (K) |
|-----------------|------------|--------------|-----------|
| $\text{KCuF}_3$ | F - AF1    |              | -3079     |
| $\text{KCuF}_3$ | AF2 - AF3  |              | -1373     |
| $\text{KCuF}_3$ | AF1 - AF3  | 1021         |           |
| $\text{KCuF}_3$ | F - AF2    | 737          |           |

**Table 2SI.** Magnetic coupling parameters between Cu pairs in  $ab$  planes ( $J_{ab}$ ) and along the  $c$  axis ( $J_c$ ) determined with the BECKE and LYP exchange and correlation functionals, respectively, with a 40% Hartree-Fock exchange contribution.

| Material          | Transition | $J_{ab}$ (K) | $J_c$ (K) |
|-------------------|------------|--------------|-----------|
| KCuF <sub>3</sub> | F - AF1    |              | -150      |
| KCuF <sub>3</sub> | AF2 - AF3  |              | -212      |
| KCuF <sub>3</sub> | AF1 - AF3  | 10           |           |
| KCuF <sub>3</sub> | F - AF2    | -39          |           |
