# Supplementary material for: Electronic Structure and Magnetic Coupling of Pure and Mg-Doped KCuF3
Source: Hindawi journal article supplement (doi:10.1155/2018/9164270), 2018-08-15
Supplement: f1 [file 9164270.f1.zip]

Archive with 3 entries (2 files):
- 9164270.f1/
- 9164270.f1/9164270_SupplDesc.docx
- 9164270.f1/mat.9164270.v2.pdf
