# Supplementary material for: Electronic Structure and Magnetic Coupling of Pure and Mg-Doped KCuF3
Source: Hindawi journal article supplement (doi:10.1155/2018/9164270), 2018-08-15
Supplement: f1 [file 9164270.f1.zip › 9164270.f1/9164270_SupplDesc.docx]

Supplementary data include total and projected DOS of pure and Mg doped KCuF3 (**FIGURE 1SI**), Projected density of states on copper atoms of pure KCuF3 (**FIGURE 2SI**), Magnetic coupling parameters between Cu pairs determined with different functionals and Hartree-Fock exchange contributions (**Tables 1SI and 2SI**).
